# Supplementary material for: A Novel In Vivo Model for Multiplexed Analysis of Callosal Connections upon Cortical Damage
Source: MDPI journal article supplement (doi:10.3390/ijms23158224), 2022-07-26
Supplement: s1 [file s1]

### Supplemental Material S3: Fiji code for stack alignment

The following examples of IJ1 macros were written for stacks of 6 and 10 slices. If you work with smaller or bigger stacks, please customize the number of iterations according to the number of slices in the stack.

Script:

*Example 1: stack with 6 slices*

***# Rename and split loop***

```
sk=getTitle()
```

```
run("Stack to Images");
```

```
run("Images to Stack", "name= title=[]");
```

```
run("Stack to Images");
```

***# Select and ROI. Stack with 6 slices.***

***# NOTE: please, customize this part depending on the number of slices in the stack.***

```
selectWindow("-0001");
```

```
roiManager("Select", 0);
```

```
selectWindow("-0002");
```

```
roiManager("Select", 1);
```

```
selectWindow("-0003");
```

```
roiManager("Select", 2);
```

```
selectWindow("-0004");
```

```
roiManager("Select", 3);
```

```
selectWindow("-0005");
```

```
roiManager("Select", 4);
```

```
selectWindow("-0006");
```

```
roiManager("Select", 5);
```

***#Align save to target, defined as "trg". NOTE: xxx is the selected target. NOTE2: please, customize this part depending on the number of slices in the stack. An example is offered below for a stack of 6 samples.***

```

trg= getString ("Target image, xxxx", 0003);
st1= "source=-0001 target=-"+trg+" rotate";
run("Align Image by line ROI", st1);
st2= "source=-0002 target=-"+trg+" rotate";
run("Align Image by line ROI", st2);
st3= "source=-0003 target=-"+trg+" rotate";
run("Align Image by line ROI", st3);
st4= "source=-0004 target=-"+trg+" rotate";
run("Align Image by line ROI", st4);
st5= "source=-0005 target=-"+trg+" rotate";
run("Align Image by line ROI", st5);
st6= "source=-0006 target=-"+trg+" rotate";
run("Align Image by line ROI", st6);
run("Images to Stack", "name=SkA title=aligned");
run("8-bit");

```

*Example 2: stack with 10 slices*

***# Rename and split loop***

```

sk=getTitle()
run("Stack to Images");
run("Images to Stack", "name= title=[]");
run("Stack to Images");

```

***# Select and ROI. Stack with 6 slices.***

***# NOTE: please, customize this part depending on the number of slices in the stack.***

```

selectWindow("-0001");
roiManager("Select", 0);
selectWindow("-0002");
roiManager("Select", 1);

```

```
selectWindow("-0003");
roiManager("Select", 2);
selectWindow("-0004");
roiManager("Select", 3);
selectWindow("-0005");
roiManager("Select", 4);
selectWindow("-0006");
roiManager("Select", 5);
selectWindow("-0007");
roiManager("Select", 6);
selectWindow("-0008");
roiManager("Select", 7);
selectWindow("-0009");
roiManager("Select", 8);
selectWindow("-0010");
roiManager("Select", 9);
```

***#Align save to target, defined as "trg". NOTE: xxx is the selected target. Stack with 10 slices.***

***# NOTE: please, customize this part depending on the number of slices in the stack.***

```
trg= getString ("Target image, xxxx", 0003);
st1= "source=-0001 target=-"+trg+" rotate";
run("Align Image by line ROI", st1);
st2= "source=-0002 target=-"+trg+" rotate";
run("Align Image by line ROI", st2);
st3= "source=-0003 target=-"+trg+" rotate";
run("Align Image by line ROI", st3);
st4= "source=-0004 target=-"+trg+" rotate";
```

```
run("Align Image by line ROI", st4);  
st5= "source=-0005 target=-"+trg+" rotate";  
run("Align Image by line ROI", st5);  
st6= "source=-0006 target=-"+trg+" rotate";  
run("Align Image by line ROI", st6);  
st7= "source=-0007 target=-"+trg+" rotate";  
run("Align Image by line ROI", st7);  
st8= "source=-0008 target=-"+trg+" rotate";  
run("Align Image by line ROI", st8);  
st9= "source=-0009 target=-"+trg+" rotate";  
run("Align Image by line ROI", st9);  
st10= "source=-0010 target=-"+trg+" rotate";  
run("Align Image by line ROI", st10);  
run("Images to Stack", "name=SkA title=aligned");  
run("8-bit");
```
