# Supplementary material for: A Novel In Vivo Model for Multiplexed Analysis of Callosal Connections upon Cortical Damage
Source: MDPI journal article supplement (doi:10.3390/ijms23158224), 2022-07-26
Supplement: s1 [file s1]

**Supplemental Material S1: Score criteria for Motor characterization of CCD model**

| <b>Table S1. Rotating pole test (Talhada, <i>et al.</i> 2019)</b> |                                                                                             |
|-------------------------------------------------------------------|---------------------------------------------------------------------------------------------|
| <b>Score</b>                                                      | <b>Criteria</b>                                                                             |
| 0                                                                 | Animal falls off immediately upon entry onto the pole                                       |
| 1                                                                 | Animal remains embraced to the pole unable to cross and eventually falls off the pole       |
| 2                                                                 | Animal falls off during crossing or if the hind limbs do not contribute to forward movement |
| 3                                                                 | Animal crosses the pole while continuously slipping with the fore- or hind limbs            |
| 4                                                                 | Animal crosses pole with more than 3ft slips                                                |
| 5                                                                 | Animal traverses the pole with 1-3 foot slips                                               |
| 6                                                                 | Animal crosses the pole without any foot slips.                                             |

| <b>Table S2. Narrow/Wide-spaced ladder</b> |                                                   |
|--------------------------------------------|---------------------------------------------------|
| <b>Score</b>                               | <b>Criteria</b>                                   |
| 1                                          | Impossible to walk                                |
| 2                                          | Asymmetric walking pattern, more than 7 mistakes  |
| 3                                          | Asymmetric walking pattern, more than 4 mistakes  |
| 4                                          | Slightly asymmetric walking pattern, 2-4 mistakes |
| 5                                          | Perfect walking                                   |

| <b>Table S3. Treadmill</b> |                                                  |
|----------------------------|--------------------------------------------------|
| <b>Score</b>               | <b>Criteria</b>                                  |
| 1                          | Impossible to walk                               |
| 2                          | Difficulties in coordination, clearly unbalanced |
| 3                          | Obviously impaired and unbalanced                |
| 4                          | Slightly impaired and unbalanced                 |
| 5                          | Perfect walking                                  |

**Tables S1-S3.** Scoring system used for the rotating pole (Table 1), narrow- and wide-spaced ladder (Table 2) and treadmill (Table 3) to evaluate the functional motor outcome performed by the aged mice before, D2 and D7 after CCD.

| Table S4. Detection settings |      |
|------------------------------|------|
| Camera gain (dB)             | 7.4  |
| Green Intensity Threshold    | 0.12 |
| Red Ceiling Light (V)        | 17.7 |
| Green Walkway Light (V)      | 16   |

| Table S5. Run criteria                      |      |
|---------------------------------------------|------|
| Minimum run duration (s)                    | 0.55 |
| Maximum run duration (s)                    | 4    |
| Minimum number of compliant runs to acquire | 10   |
| Use maximum allowed speed variation (%)     | 60   |

**Tables S4-S5.** Experimental options of Catwalk XT software to adjust detection settings (Table 4) for an appropriate animal recording and run criteria (Table 5) to filter valid runs for further automatic analysis.
